# Supplementary material
Source: publisher site journal article supplement (https://www.dovepress.com/article/509625)
Supplement: Supplementary file 1 [file get_supplementary_file.php]

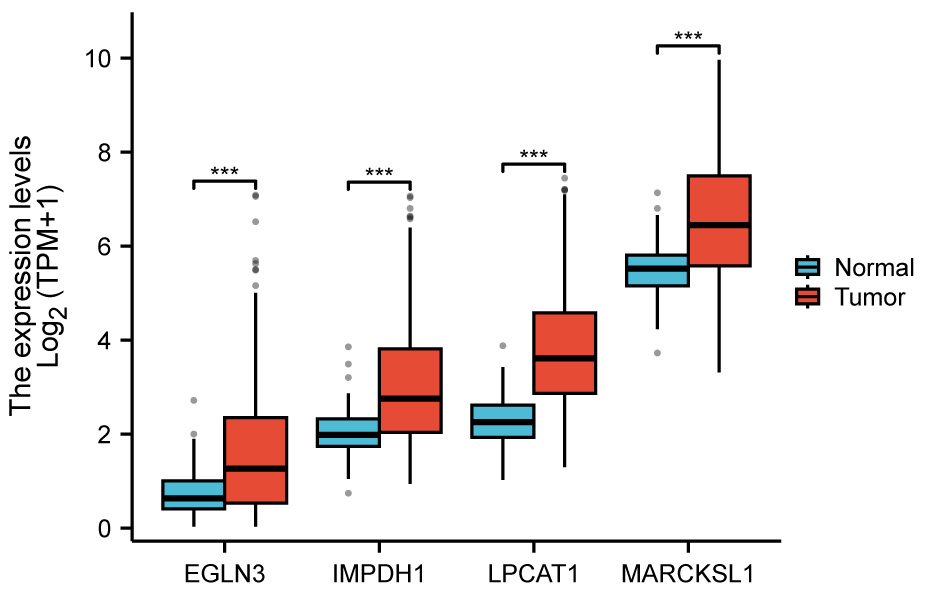


Supplementary figure 1. Box plots showing the differential expression of four genes (EGLN3, IMPDH1, LPCAT1, and MARCKSL1) between liver cancer tissues and adjacent non-tumor tissues, based on data from the TCGA database. ***p < 0.001.


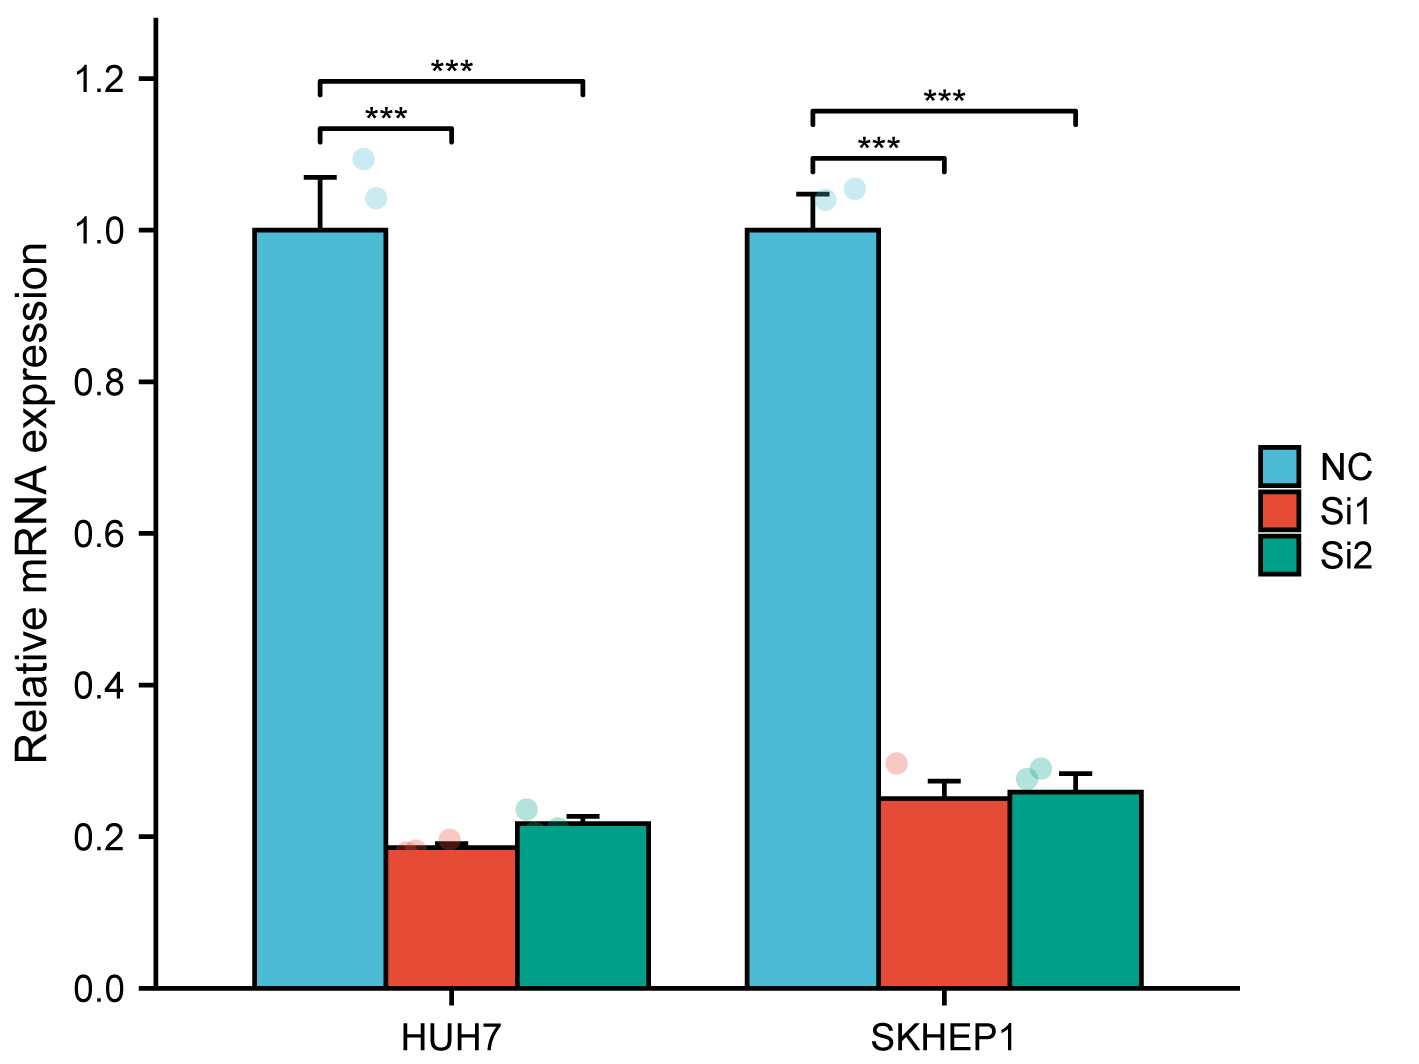


Supplementary figure 2. The native expression and knockdown expression of HOXC9 in HUH7 and SKHEP1 cell lines. ***p < 0.001.

| Characteristics | Low expression of HOXC9 | High expression of HOXC9 | P value |
| --- | --- | --- | --- |
| N | 187 | 187 |  |
| Pathologic T stage, n (%) |  |  | 0.02 |
| T1 | 102 (27.5%) | 81 (21.8%) |  |
| T2 | 36 (9.7%) | 59 (15.9%) |  |
| T3 | 43 (11.6%) | 37 (10%) |  |
| T4 | 4 (1.1%) | 9 (2.4%) |  |
| Pathologic N stage, n (%) |  |  | 0.66 |
| N0 | 130 (50.4%) | 124 (48.1%) |  |
| N1 | 3 (1.2%) | 1 (0.4%) |  |
| Pathologic M stage, n (%) |  |  | 0.60 |
| M0 | 136 (50%) | 132 (48.5%) |  |
| M1 | 1 (0.4%) | 3 (1.1%) |  |
| Pathologic stage, n (%) |  |  | 0.04 |
| Stage I | 97 (27.7%) | 76 (21.7%) |  |
| Stage II | 33 (9.4%) | 54 (15.4%) |  |
| Stage III | 47 (13.4%) | 38 (10.9%) |  |
| Stage IV | 2 (0.6%) | 3 (0.9%) |  |
| Tumor status, n (%) |  |  | 0.88 |
| Tumor free | 100 (28.2%) | 102 (28.7%) |  |
| With tumor | 77 (21.7%) | 76 (21.4%) |  |
| Gender, n (%) |  |  | 0.01 |
| Female | 49 (13.1%) | 72 (19.3%) |  |
| Male | 138 (36.9%) | 115 (30.7%) |  |
| Age, n (%) |  |  | 0.57 |
| <= 60 | 86 (23.1%) | 91 (24.4%) |  |
| > 60 | 101 (27.1%) | 95 (25.5%) |  |
| Histologic grade, n (%) |  |  | 0.04 |
| G1 | 34 (9.2%) | 21 (5.7%) |  |
| G2 | 93 (25.2%) | 85 (23%) |  |
| G3 | 54 (14.6%) | 70 (19%) |  |
| G4 | 3 (0.8%) | 9 (2.4%) |  |
| AFP(ng/ml), n (%) |  |  | 0.00 |
| <= 400 | 122 (43.6%) | 93 (33.2%) |  |
| > 400 | 18 (6.4%) | 47 (16.8%) |  |
| Child-Pugh grade, n (%) |  |  | 0.25 |
| A | 111 (46.1%) | 108 (44.8%) |  |
| B&C | 14 (5.8%) | 8 (3.3%) |  |

Supplementary table 1. The associations between HOXC9 expression levels and various clinicopathological characteristics, including TNM stage, pathologic stage, tumor status, gender, age, histologic grade, AFP levels, and Child-Pugh grade.
